# Supplementary material for: Homoleptic and heteroleptic N-alkylimidazole zinc(ii)-containing ionic liquids for high current density electrodeposition
Source: Royal Society of Chemistry journal article supplement (doi:10.1039/c4dt00182f), 2014-01-01
Supplement: c4dt00182f1.pdf [file c4dt00182f1.pdf]

Electronic supplementary information

**Homoleptic and heteroleptic *N*-alkylimidazole zinc(II)-containing  
ionic liquids for high current density electrodeposition**

Marc Steichen, Neil R. Brooks, Luc Van Meervelt, Jan Fransaer and Koen Binnemans\*

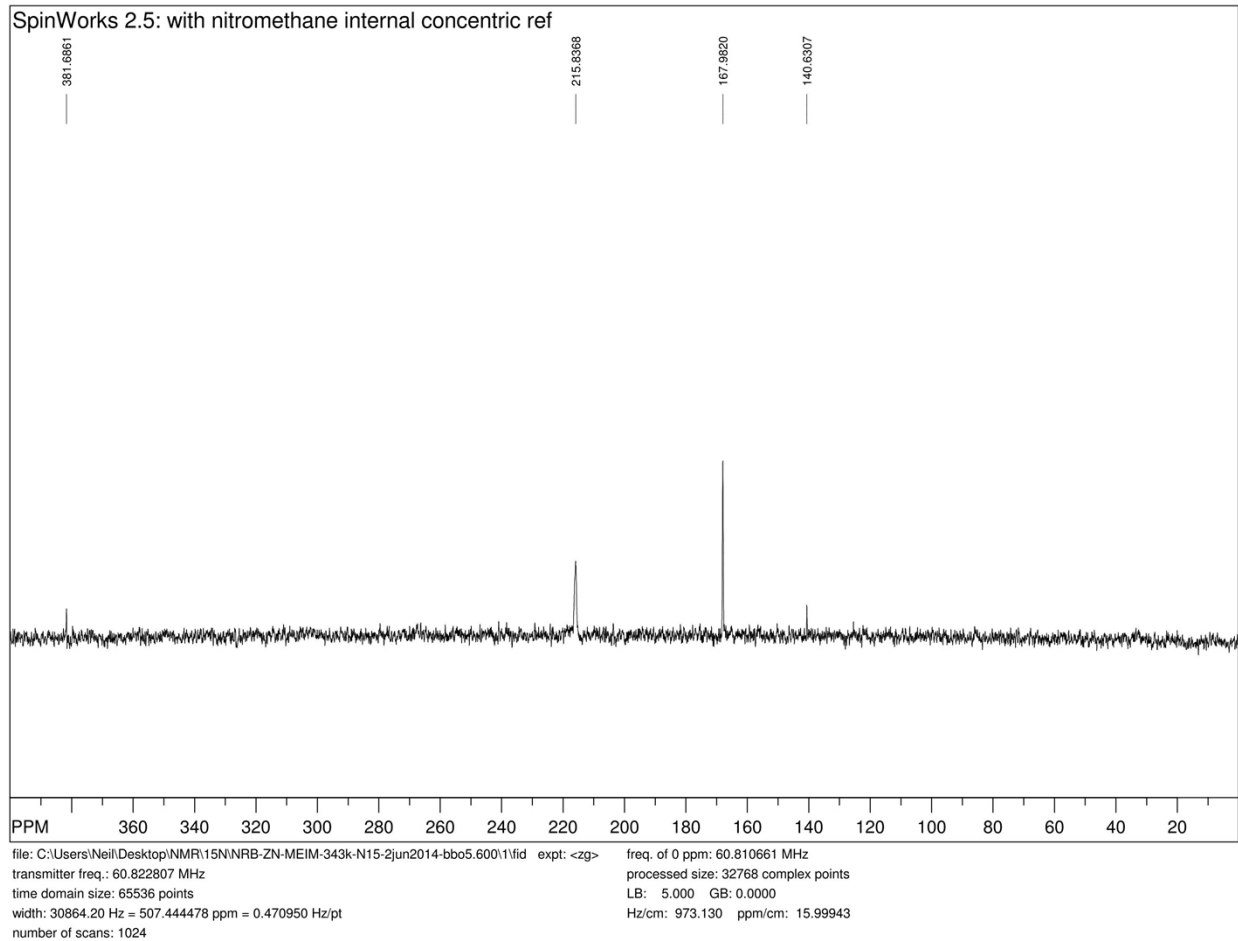

Figure S1:  $^{15}\text{N}$  NMR spectrum of liquid  $[\text{Zn}(\text{MeIm})_6][\text{Tf}_2\text{N}]_2$  containing a small sealed glass tube of  $\text{CH}_3\text{NO}_2$  as a standard for the  $^{15}\text{N}$  (381.7 ppm) chemical shifts at a temperature of 70 °C.

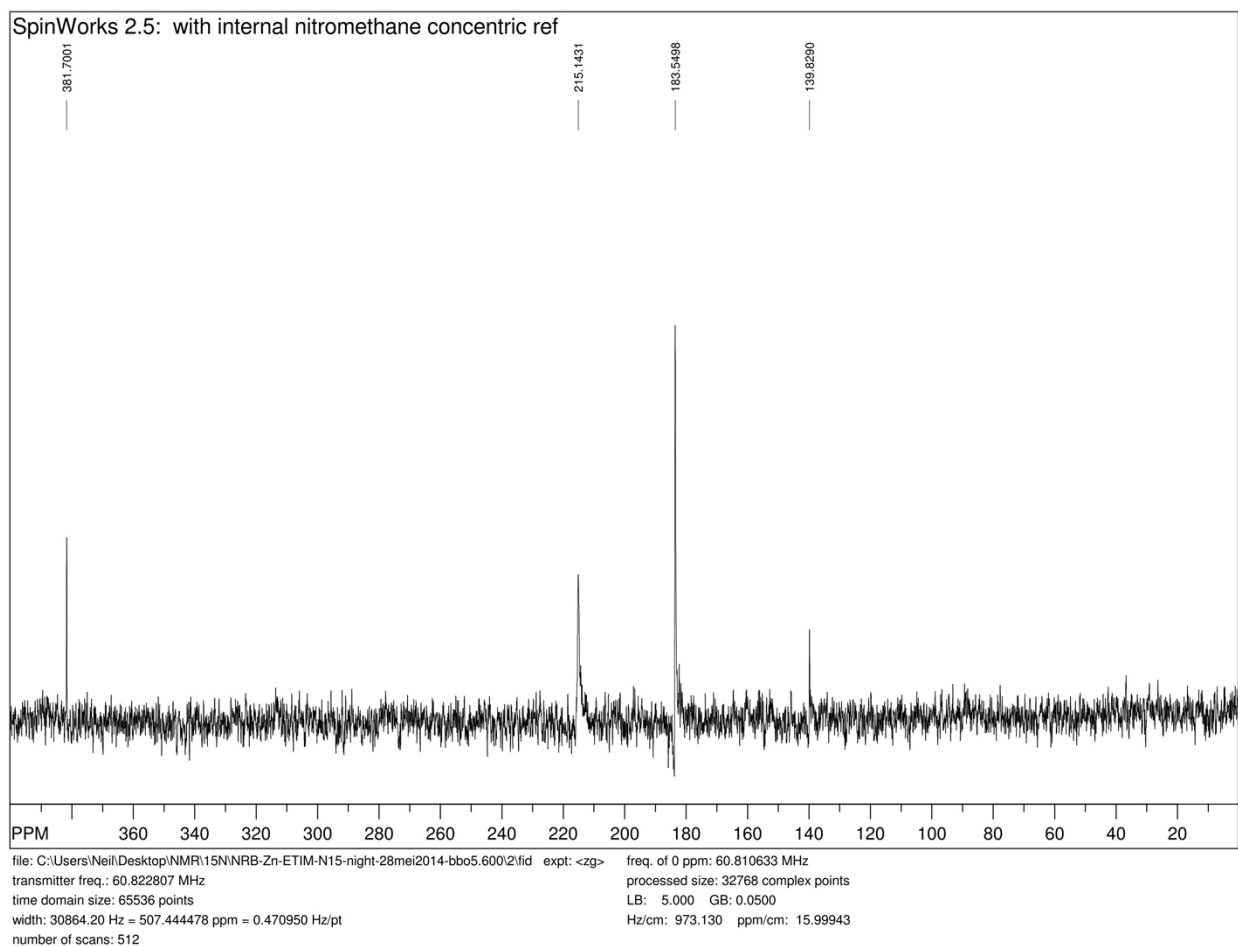

Figure S2:  $^{15}\text{N}$  NMR spectrum of liquid  $[\text{Zn}(\text{EtIm})_6][\text{Tf}_2\text{N}]_2$  containing a small sealed glass tube of  $\text{CH}_3\text{NO}_2$  as a standard for the  $^{15}\text{N}$  (381.7 ppm) chemical shifts at a temperature of 40 °C.

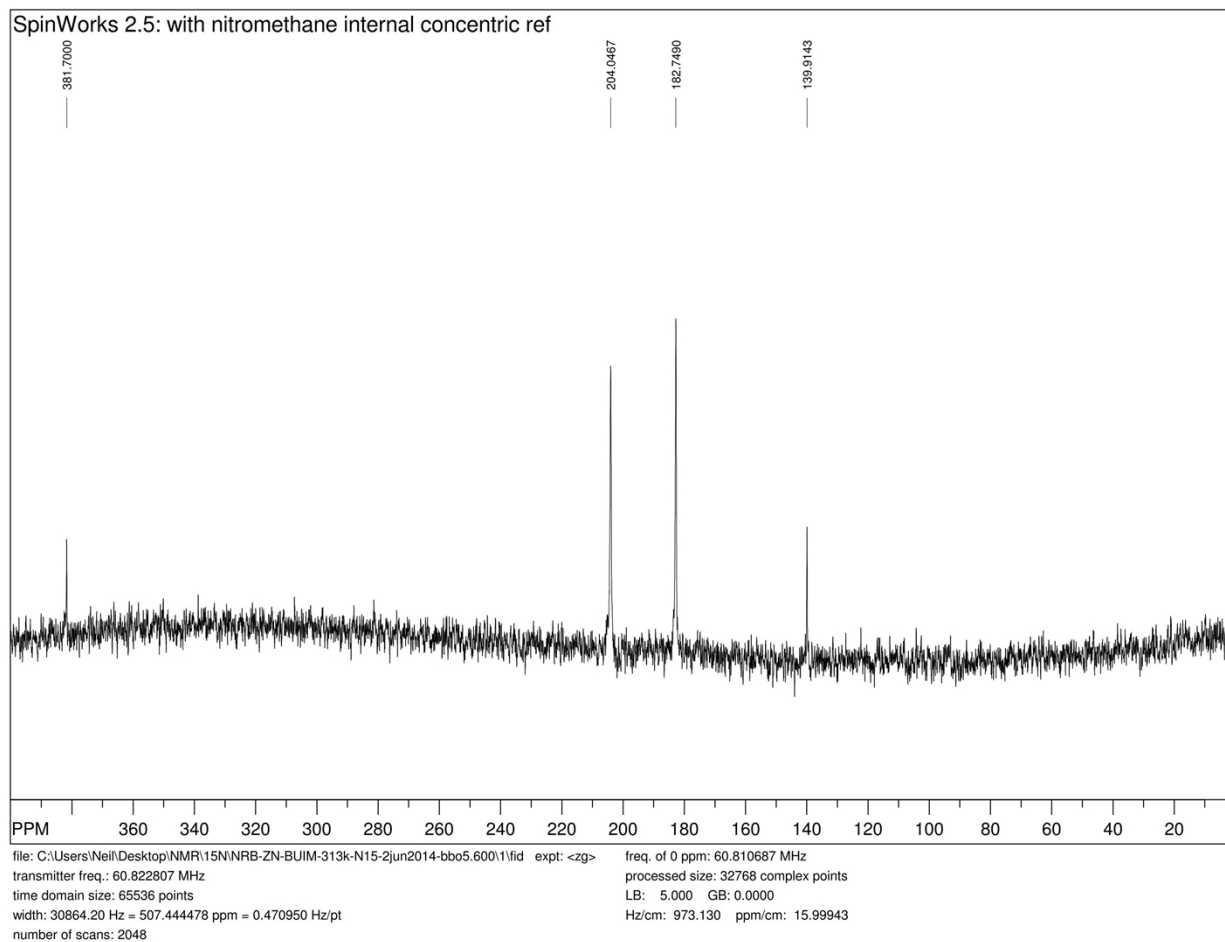

Figure S3:  $^{15}\text{N}$  NMR spectrum of liquid  $[\text{Zn}(\text{BuIm})_6][\text{Tf}_2\text{N}]_2$  containing a small sealed glass tube of  $\text{CH}_3\text{NO}_2$  as a standard for the  $^{15}\text{N}$  (381.7 ppm) chemical shifts at a temperature of 40 °C.
